# Supplementary material for: C1q/TNF-related protein-9 ameliorates hypoxia-induced pulmonary hypertension by regulating secretion of endothelin-1 and nitric oxide mediated by AMPK in rats
Source: PubMed Central journal article supplement (PMC8166879; doi:10.1038/s41598-021-90779-2), 2021-05-31

## Article

# **C1q/TNF-related protein-9 ameliorates hypoxia-induced pulmonary hypertension by regulating secretion of endothelin-1 and nitric oxide mediated by AMPK in rats**

Qiaoyan Jin<sup>1\*</sup>, Hui Su<sup>2\*</sup>, Rui Yang<sup>1\*</sup>, Yanzhen Tan<sup>3</sup>, Buyong Li<sup>3</sup>, Wei Yi<sup>3</sup>, Qianqian Dong<sup>4</sup>, Haifeng Zhang<sup>4</sup>, Wenjuan Xing<sup>5#</sup>, Xin Sun<sup>1#</sup>

<sup>1</sup>Department of Pediatrics, Xijing Hospital, Fourth Military Medical University, Xi'an, 710032, China

<sup>2</sup>Department of Geriatrics, Xijing Hospital, Fourth Military Medical University, Xi'an, 710032, China

<sup>3</sup>Department of Cardiovascular Surgery, Xijing Hospital, Fourth Military Medical University, Xi'an, 710032, China

<sup>4</sup>Teaching Experiment Center, Fourth Military Medical University, Xi'an, 710032, China

<sup>5</sup>School of Aerospace Medicine, Fourth Military Medical University, Xi'an, 710032, China

**Running head:** CTRP9 ameliorates pulmonary hypertension

\*These authors contributed equally to this study.

**#Correspondence to:**

**X. Sun**, M.D., Ph. D.

Department of Pediatrics, Xijing Hospital

Fourth Military Medical University

127 Changlexi Road

Xi'an, 710032, China

E-mail: [sunxin6@fmmu.edu.cn](mailto:sunxin6@fmmu.edu.cn)

Tel: 0086-29-84775395

Fax: 0086-29-84775395

[OR](#)

**W. Xing**, M.D., Ph. D.

School of Aerospace medicine

Fourth Military Medical University

169 Changlexi Road

Xi'an, 710032, China

E-mail: [xwjfmmu@126.com](mailto:xwjfmmu@126.com)

Tel: 0086-29-84776423

Fax: 0086-29-84776423

**Figure1**

**A: (the blots cropped from different gels)**

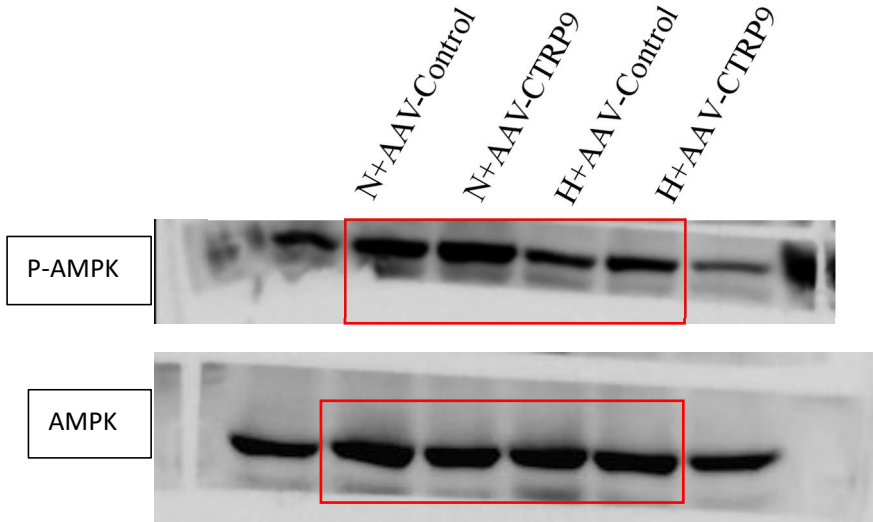

**B: (the blots cropped from different gels)**

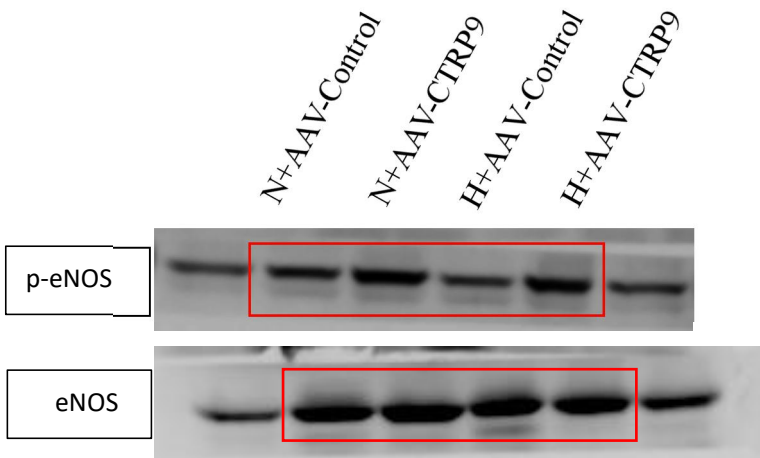

**C: (the blots cropped from different gels)**

*N+*-AAV-Control  
*N+*-AAV-CTRP9  
*H+*-AAV-Control  
*H+*-AAV-CTRP9

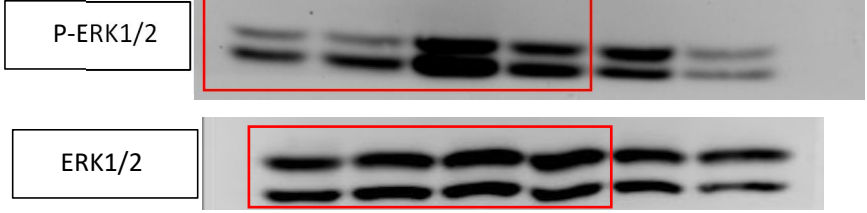

**Figure 2**

**A: (the blots cropped from different part of the same gel)**

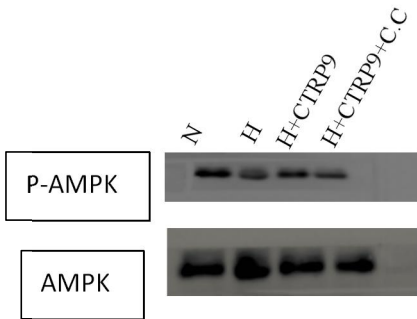

**B: (the blots cropped from different gels)**

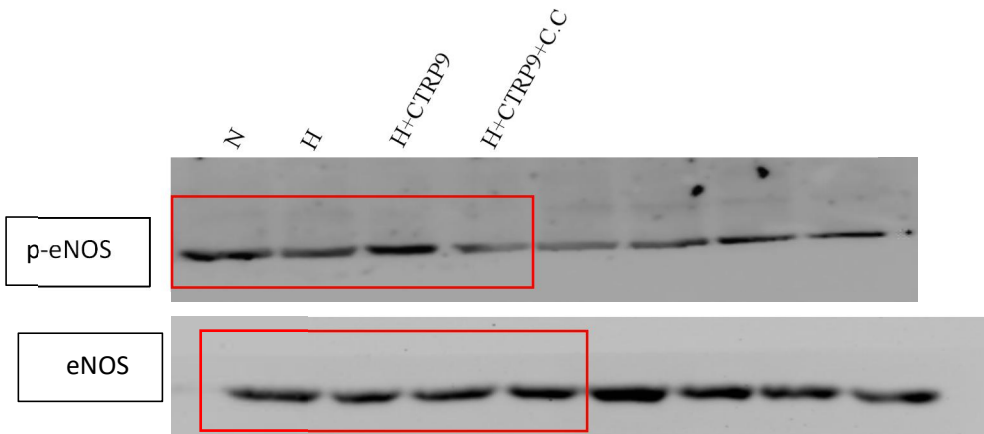

**C: (the blots cropped from different gels)**

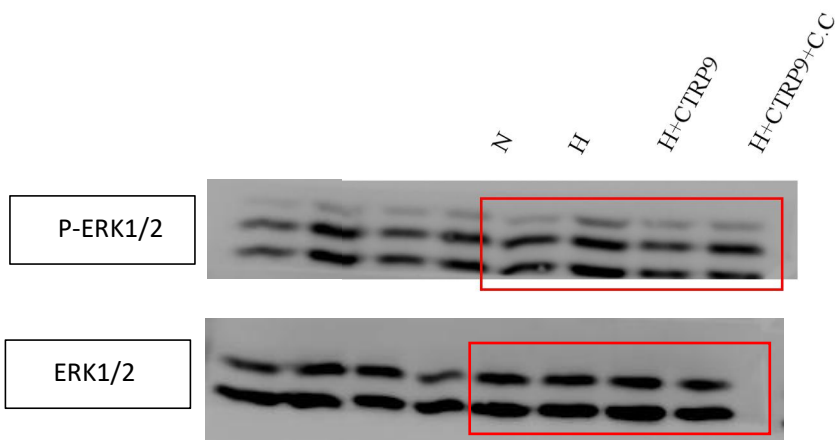

**Figure 3**

**A: (the blots cropped from different part of the same gel)**

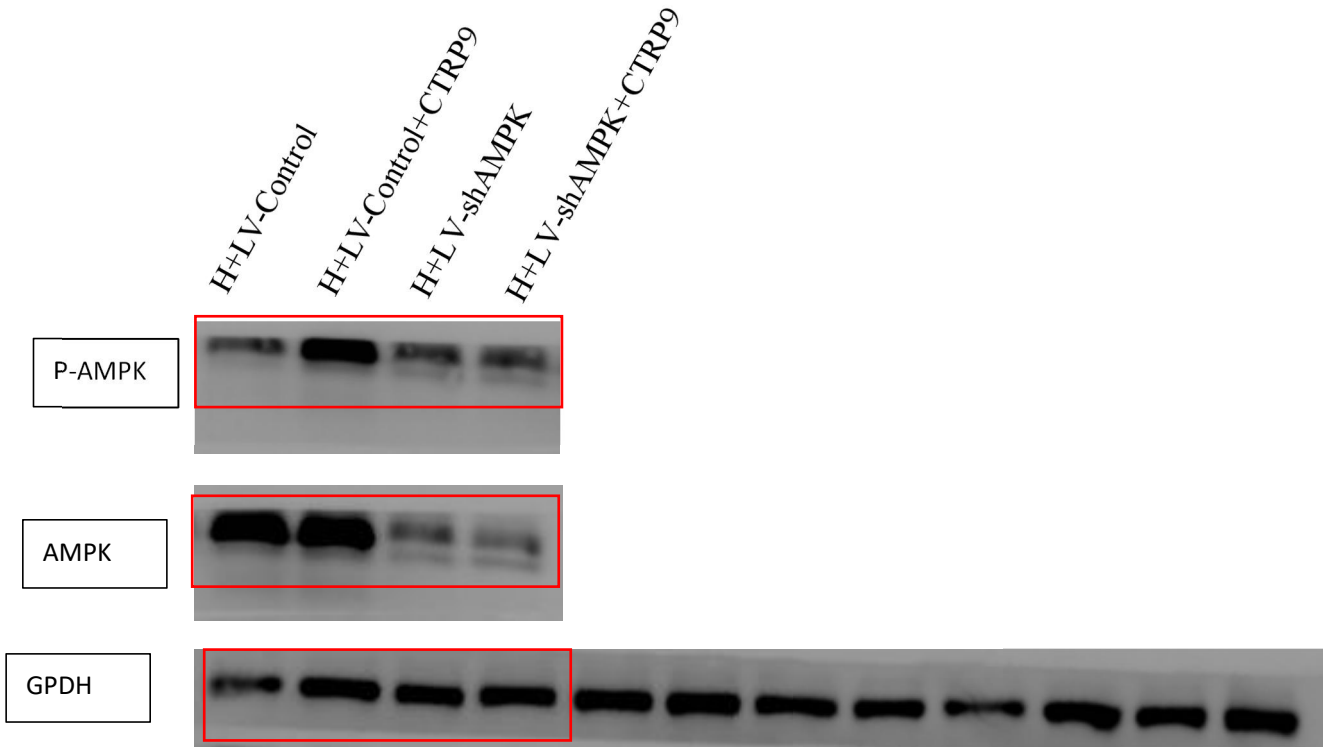

**B: (the blots cropped from different gels)**

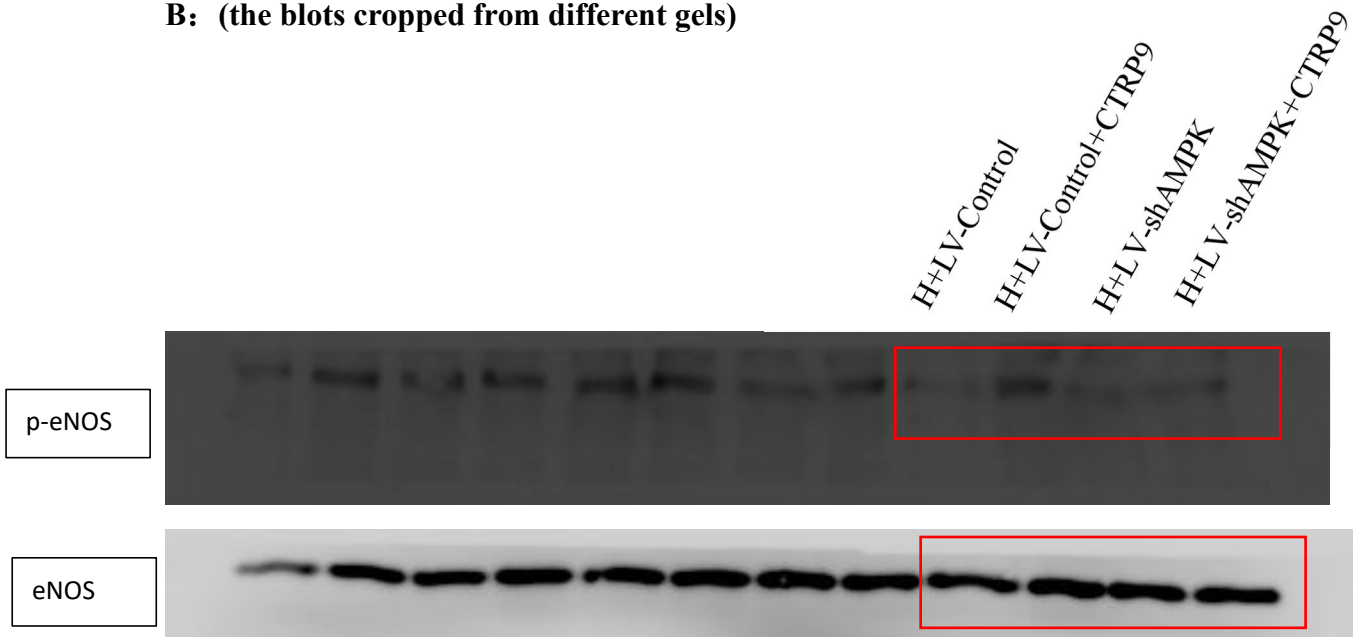

**C: (the blots cropped from different gels)**

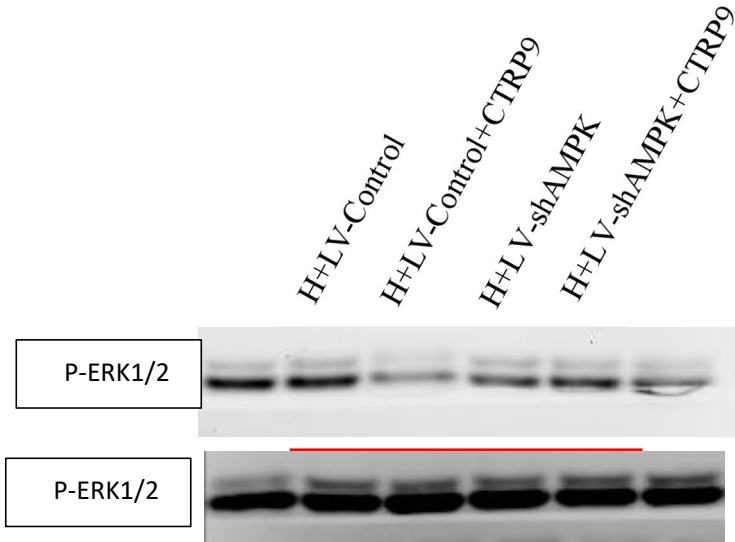

**Figure 4**

**A: The expression of GFP in lung tissues from rat with AAV-6 intra-tracheal instillation (100×)**

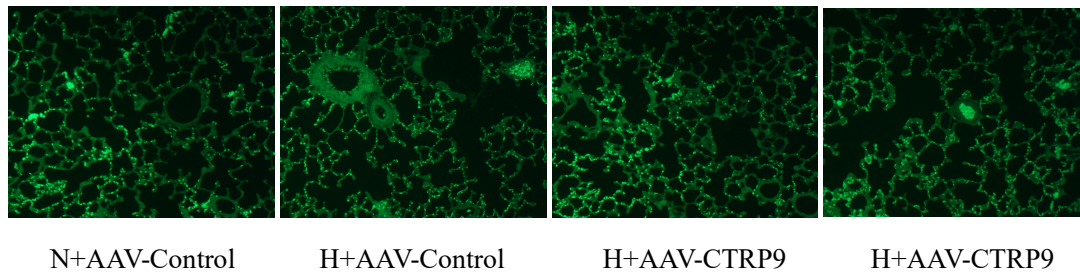

**Figure 5**

**A: The efficacy of sh-AMPK lentivirus on AMPK expression in PMVECs**

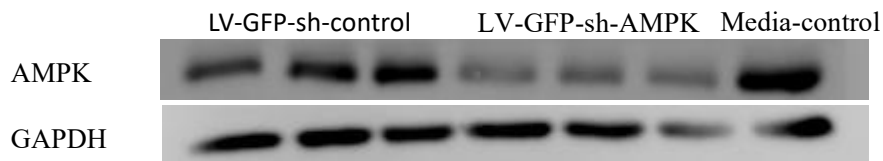

Supplement: 41598_2021_90779_MOESM2_ESM.pdf [file 41598_2021_90779_MOESM2_ESM.pdf]
